# Supplementary material for: LncRNA5251 inhibits spermatogenesis via modification of cell-cell junctions
Source: PubMed Central journal article supplement (PMC10268499; doi:10.1186/s13062-023-00381-x), 2023-06-15

## Project: Alignment of mlnc5251.sqd Contig 1

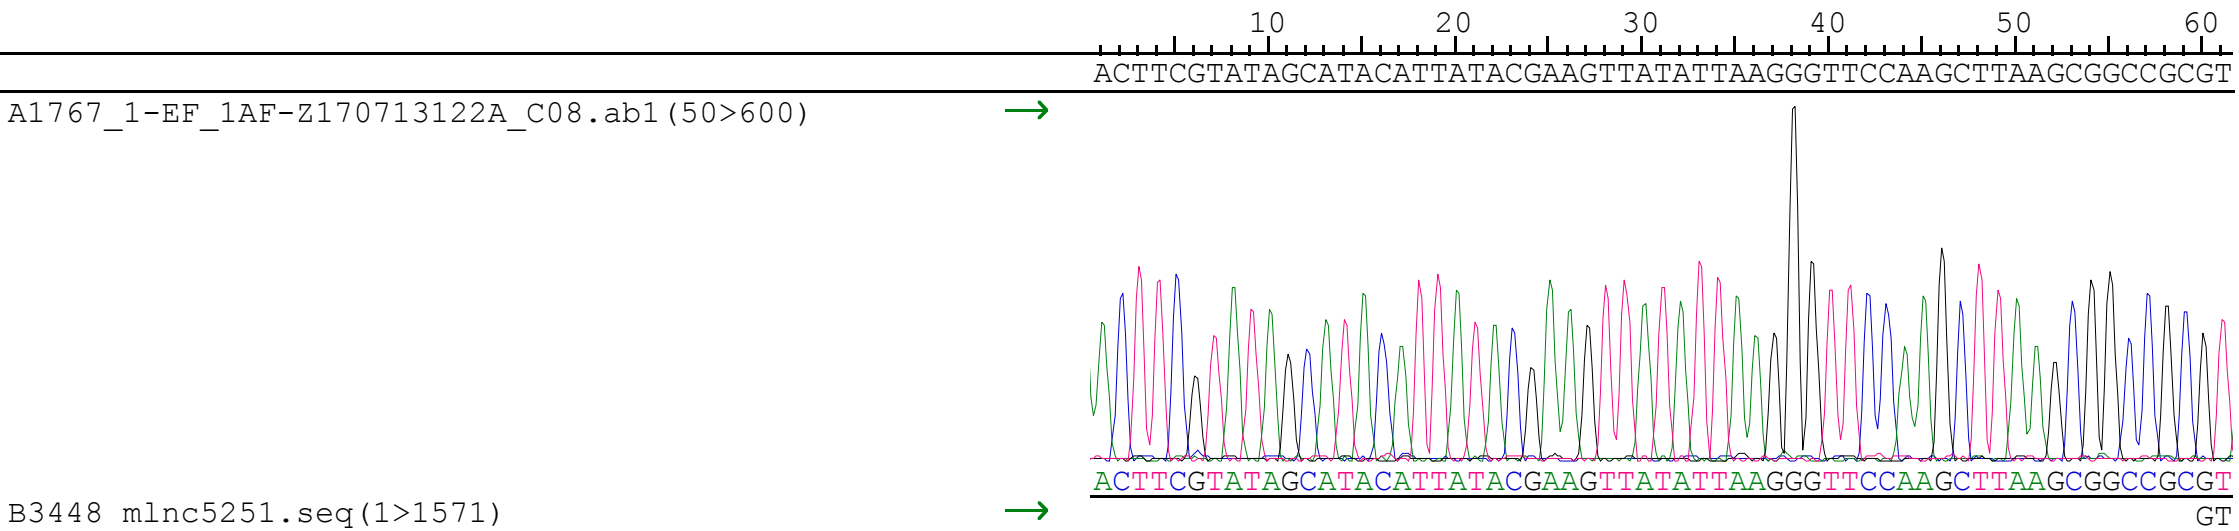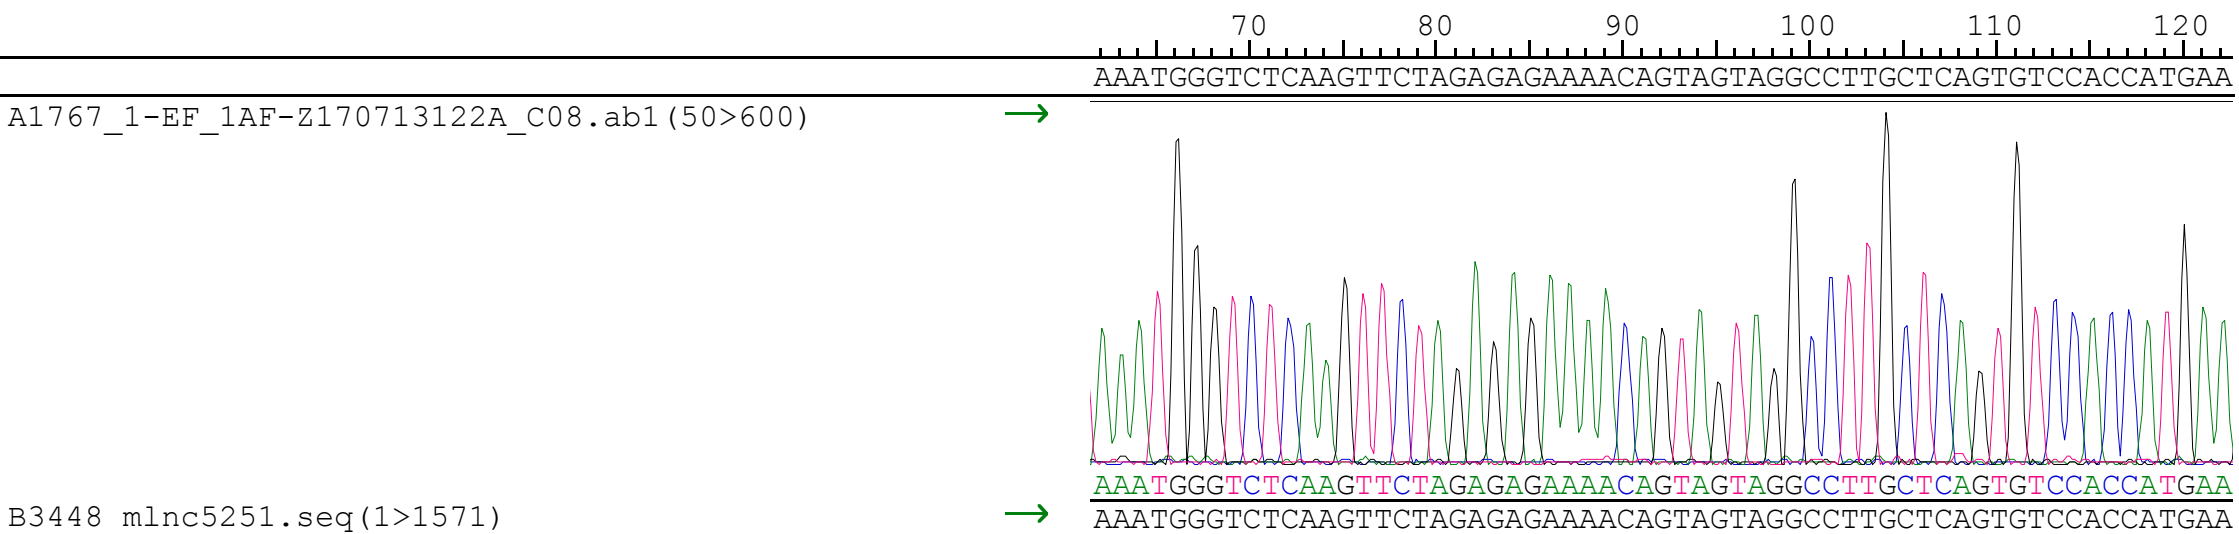

130 140 150 160 170 180

GTGCAGAAGGCACAGGTGTGACCTTTCCCCACCTTCAGGA ACTCTTCACTGGCTAACGTTT

## Project: Alignment of mlnc5251.sqk Contig 1

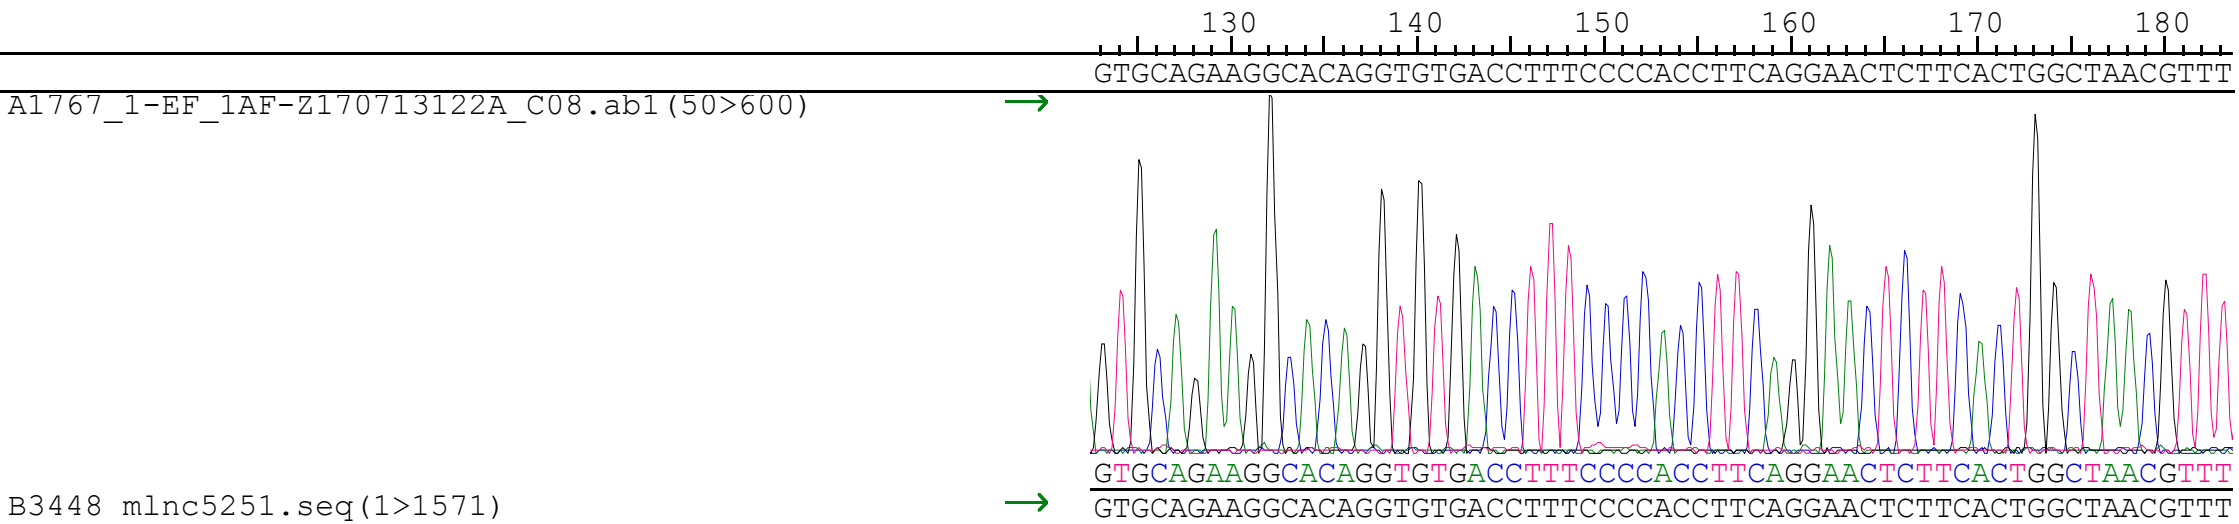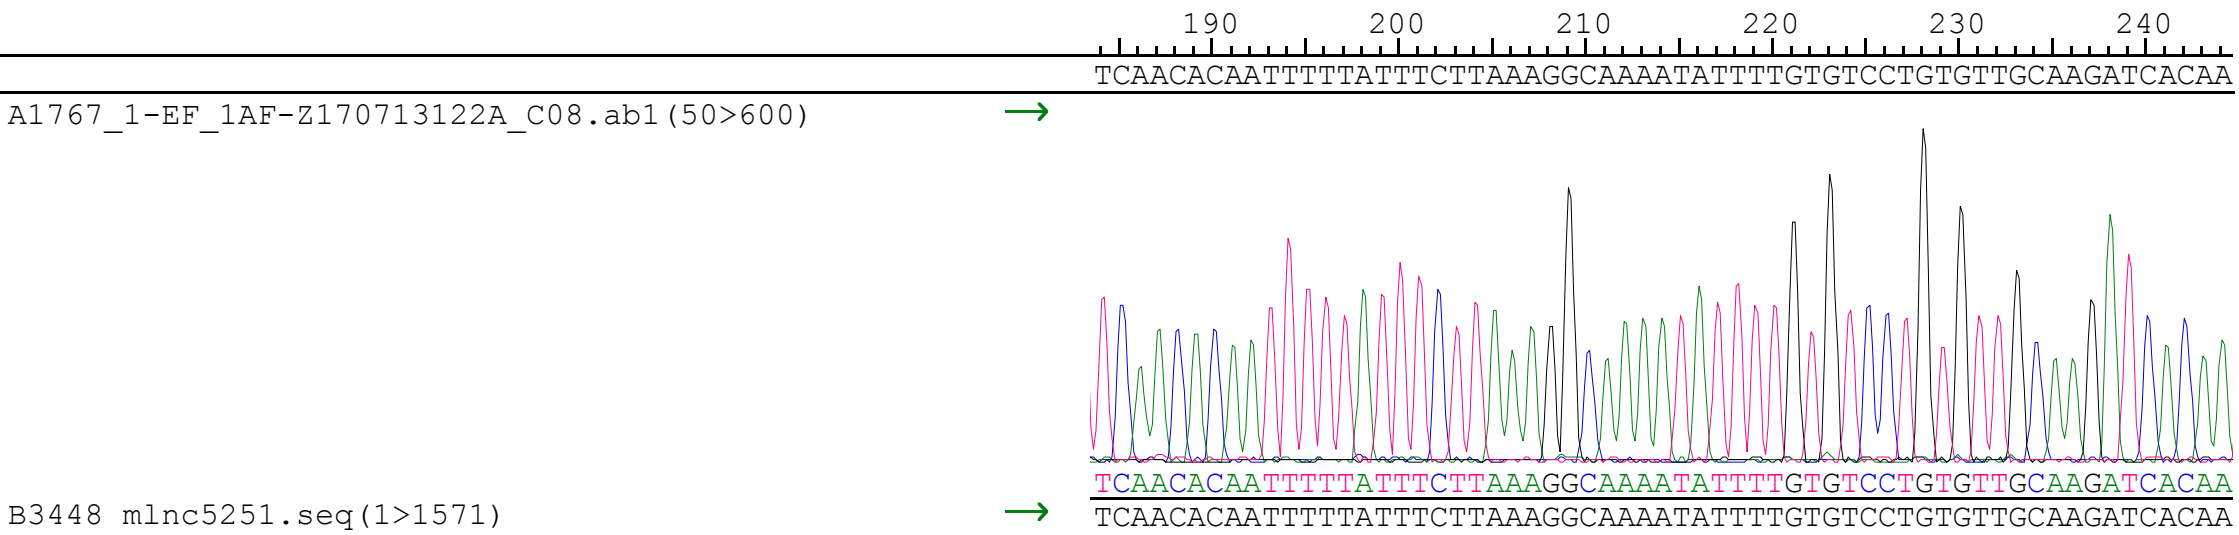

250 260 270 280 290 300

TGGTTAGTAAAATCTTAGTATTTGGAAATAGAATAAGCTTGTTTCTTCCCTTTTAAAATGT

## Project: Alignment of mlnc5251.sqd Contig 1

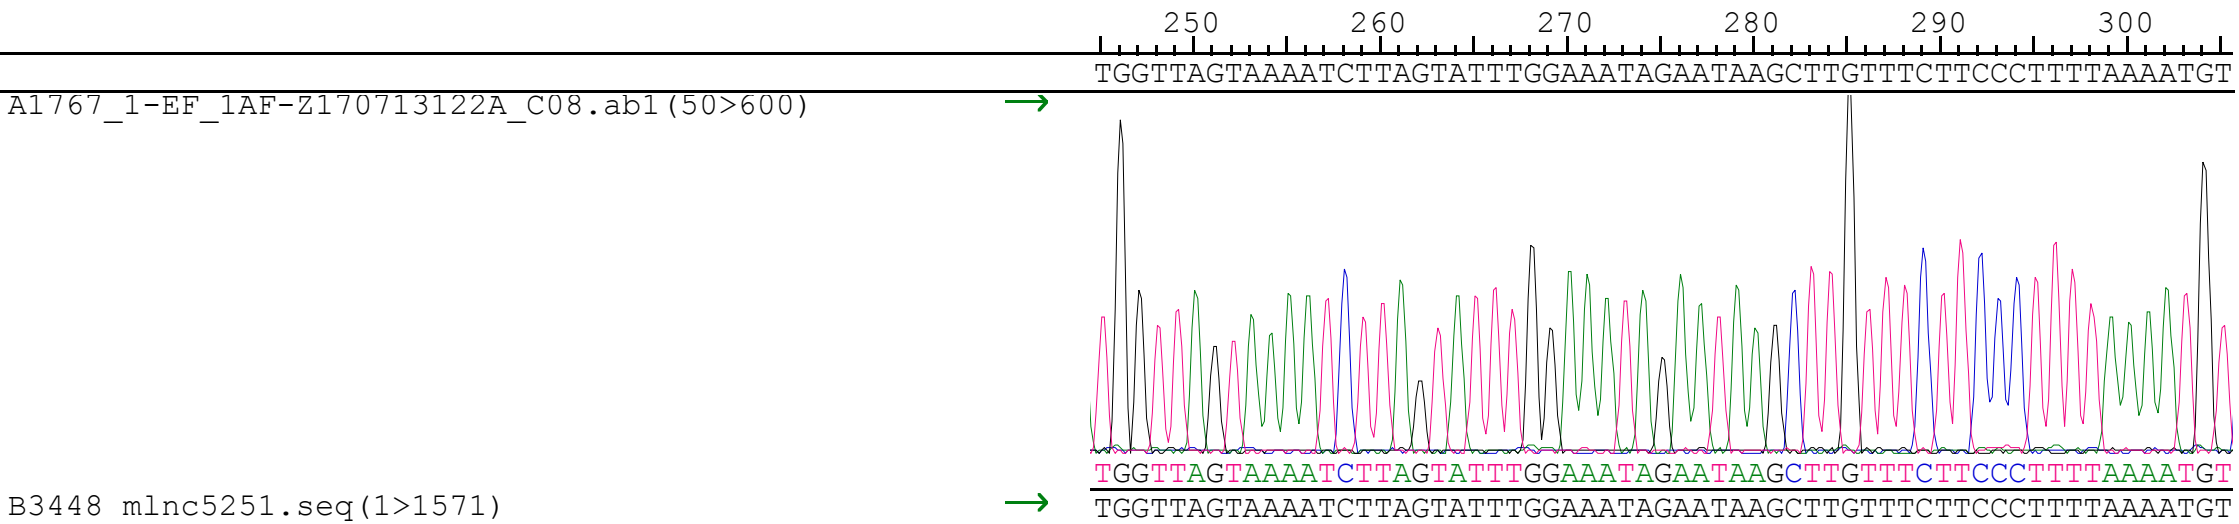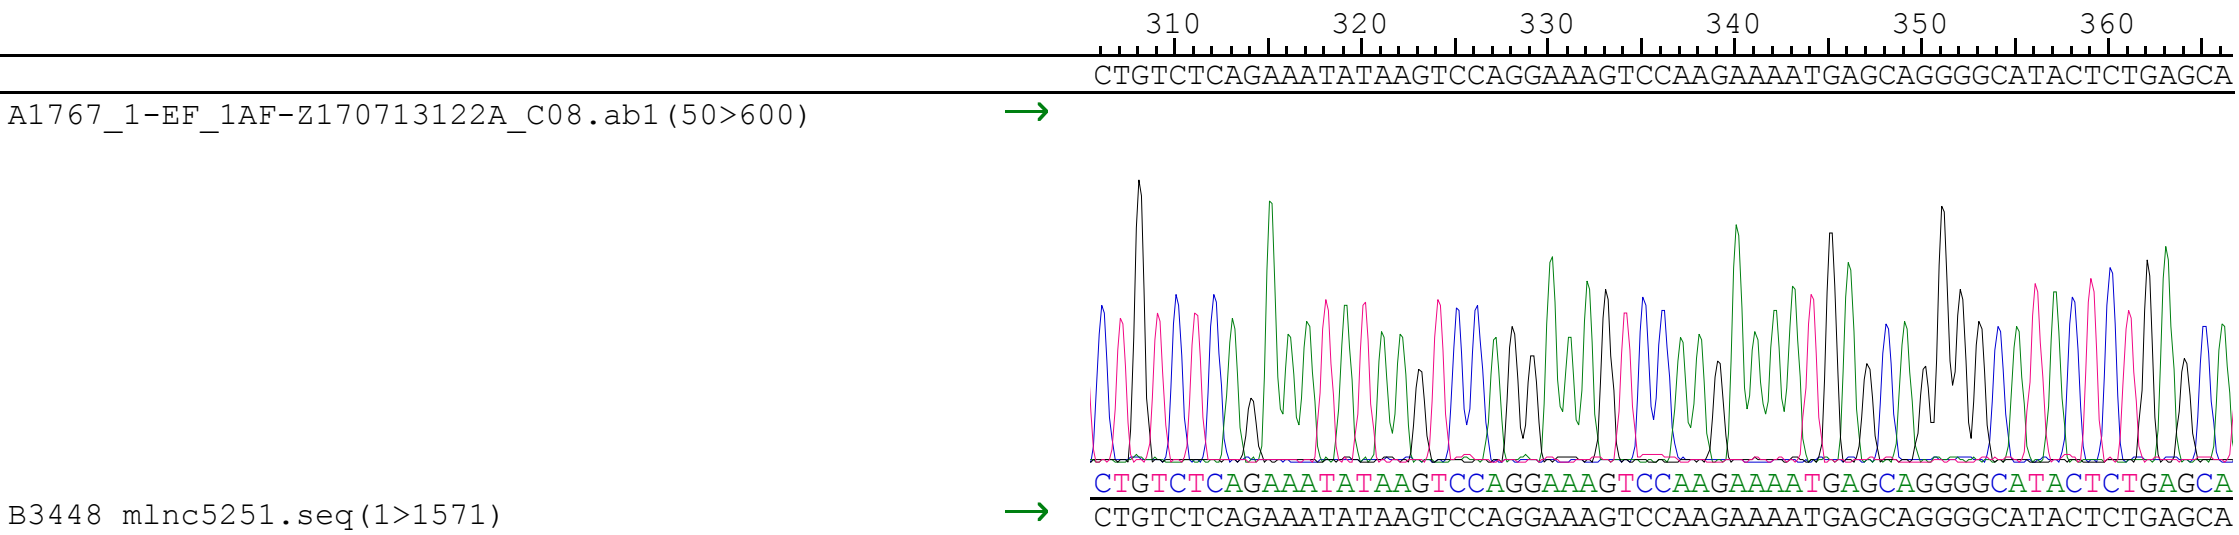

370 380 390 400 410 420

TGGTGTATGTGGGAATTTGGAGGTTTTGTAAAACCCTTTTCTCCAAGCCCATGTCACTATC

## Project: Alignment of mlnc5251.sqd Contig 1

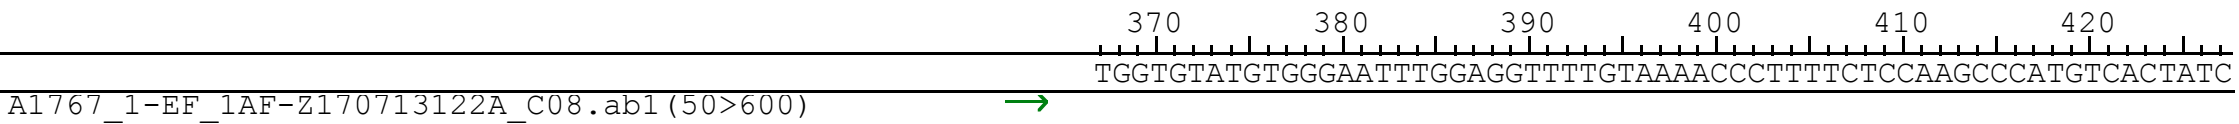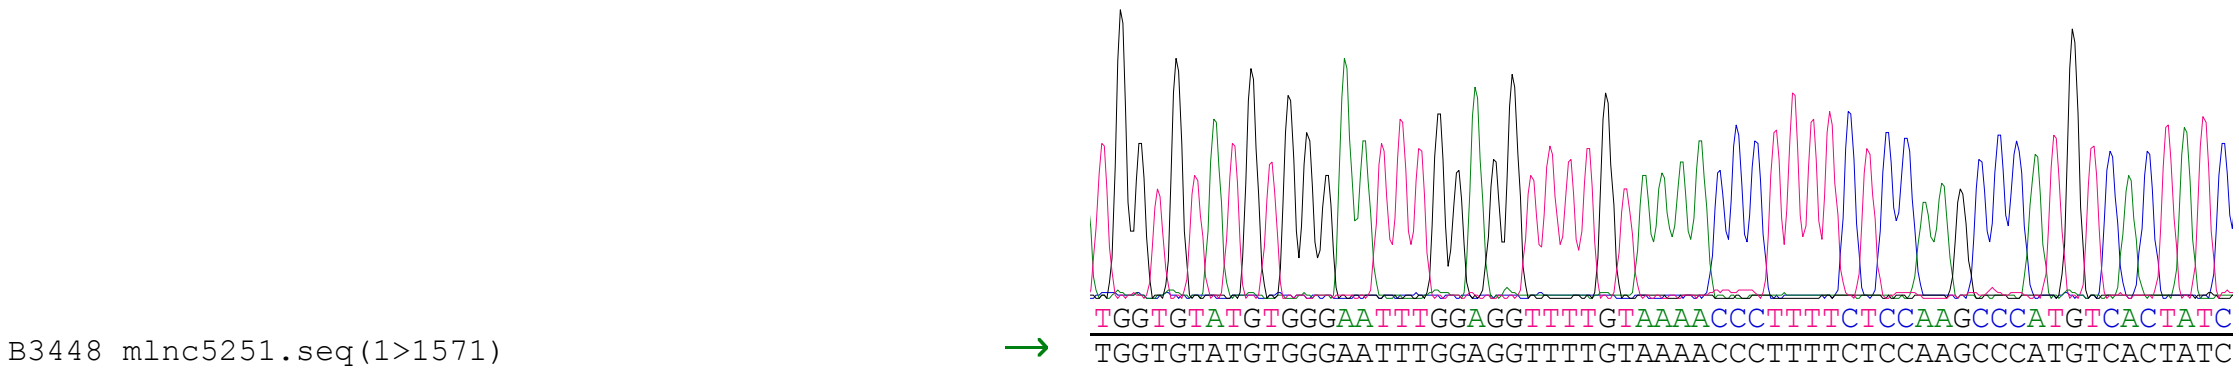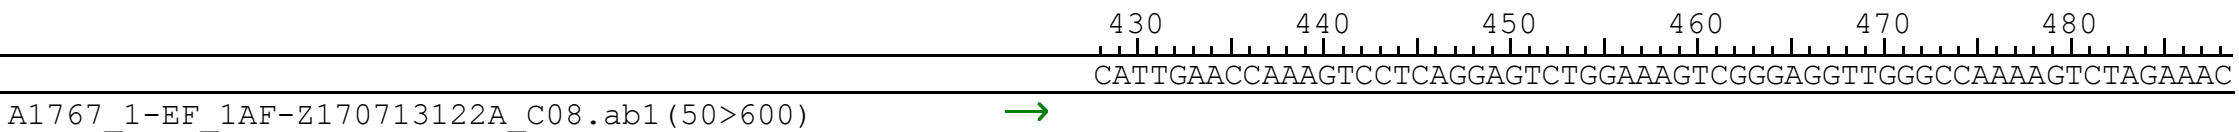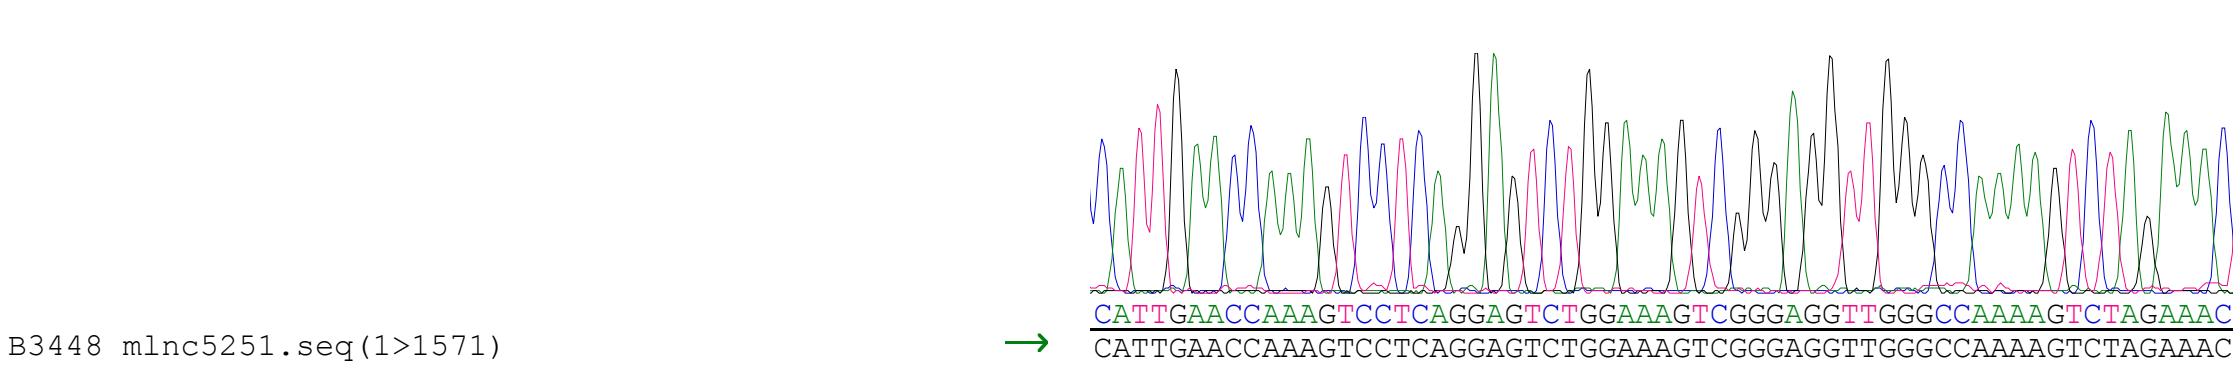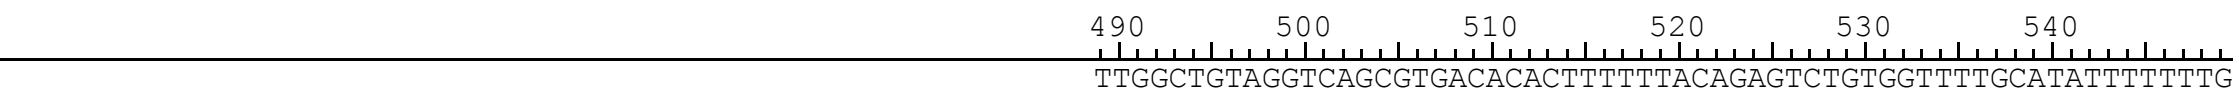

## Project: Alignment of mlnc5251.sqg Contig 1

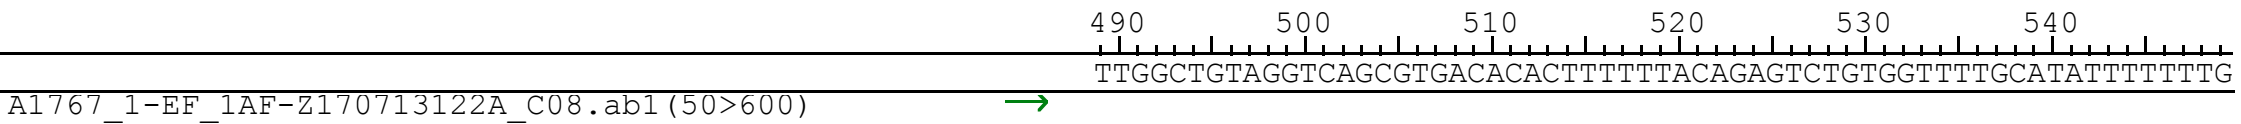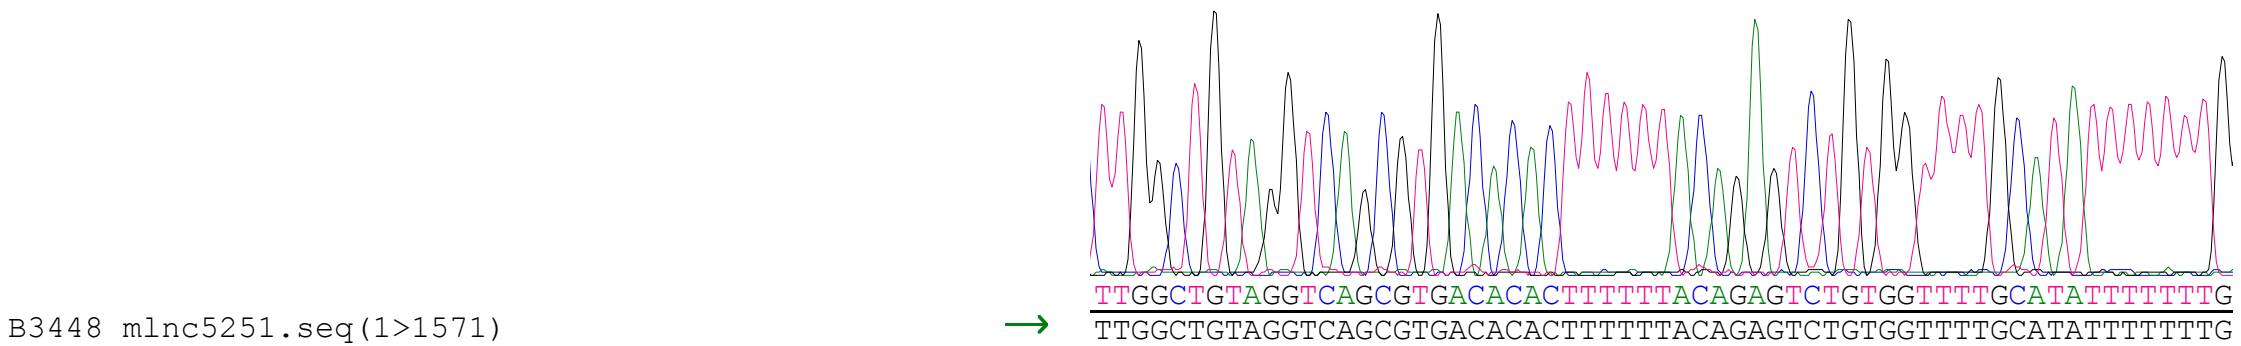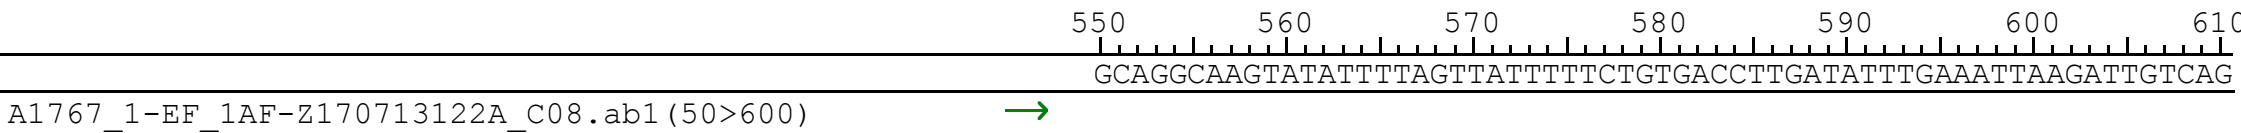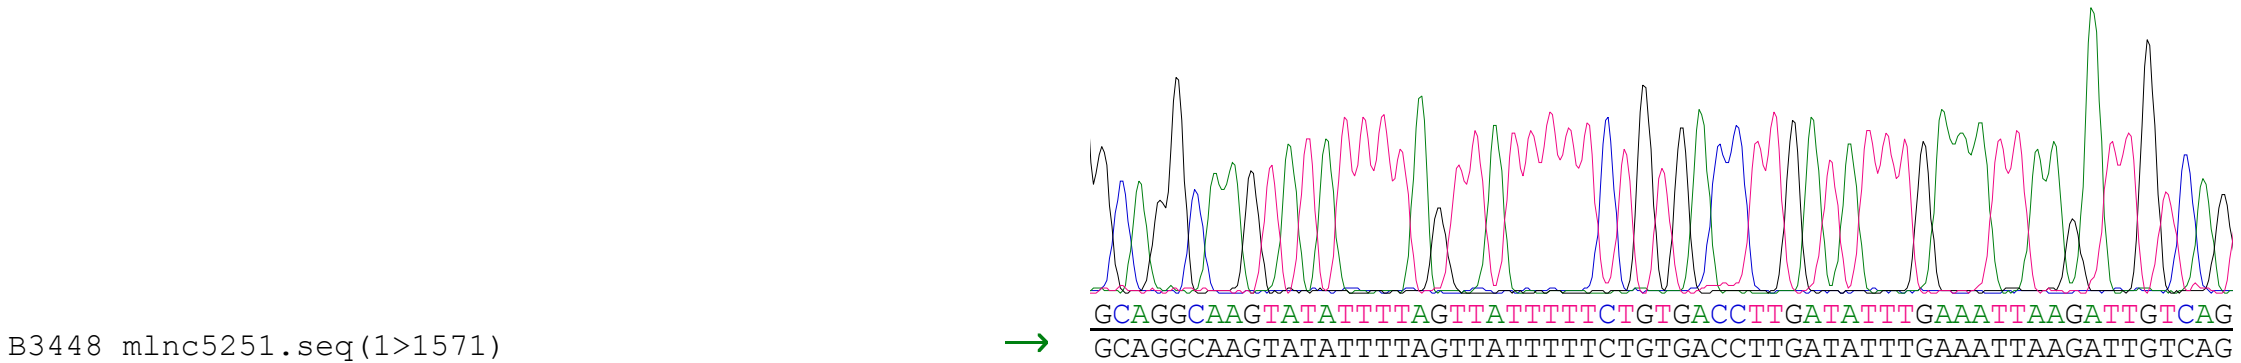



## Project: Alignment of mlnc5251.sqd Contig 1

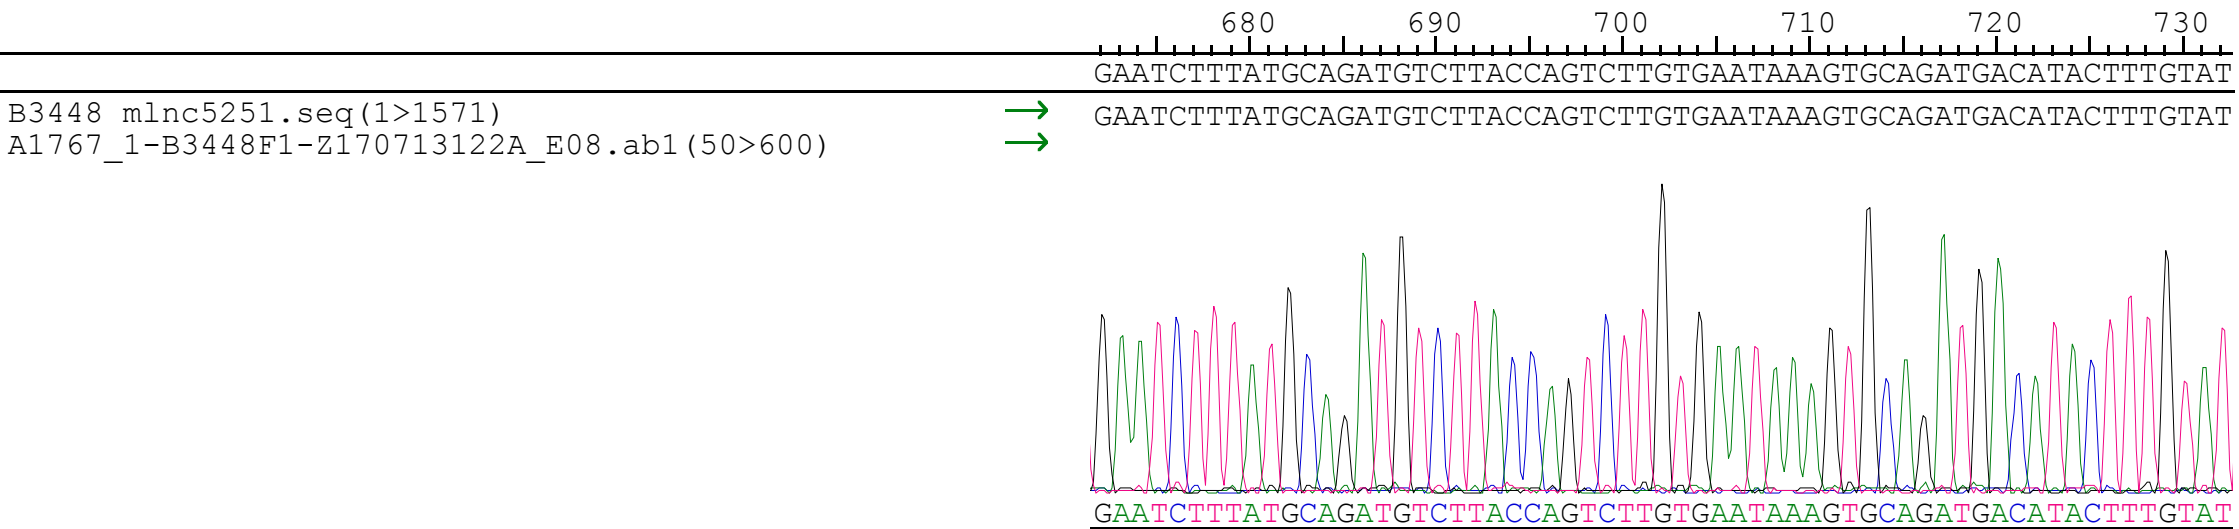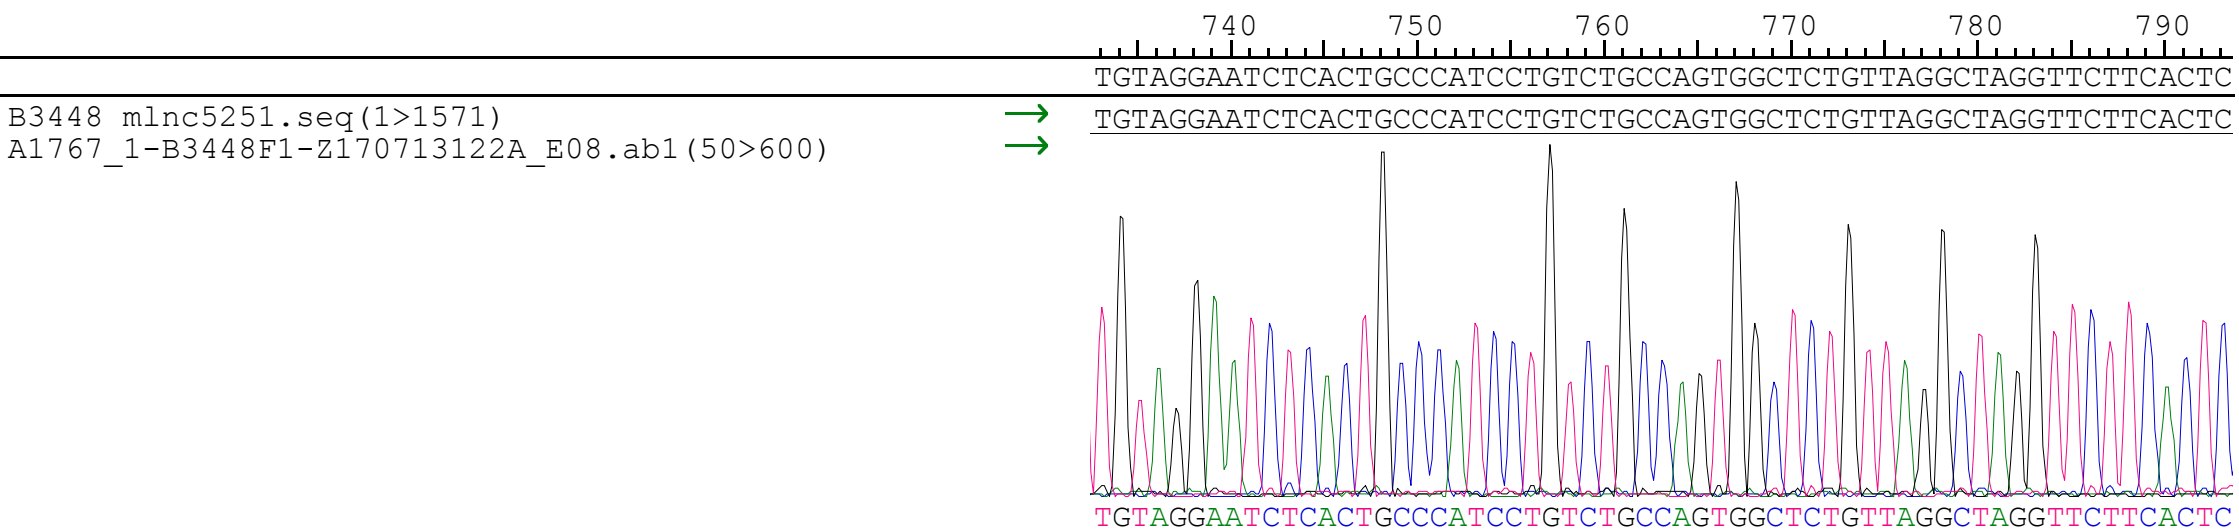

## Project: Alignment of mlnc5251.sqd Contig 1

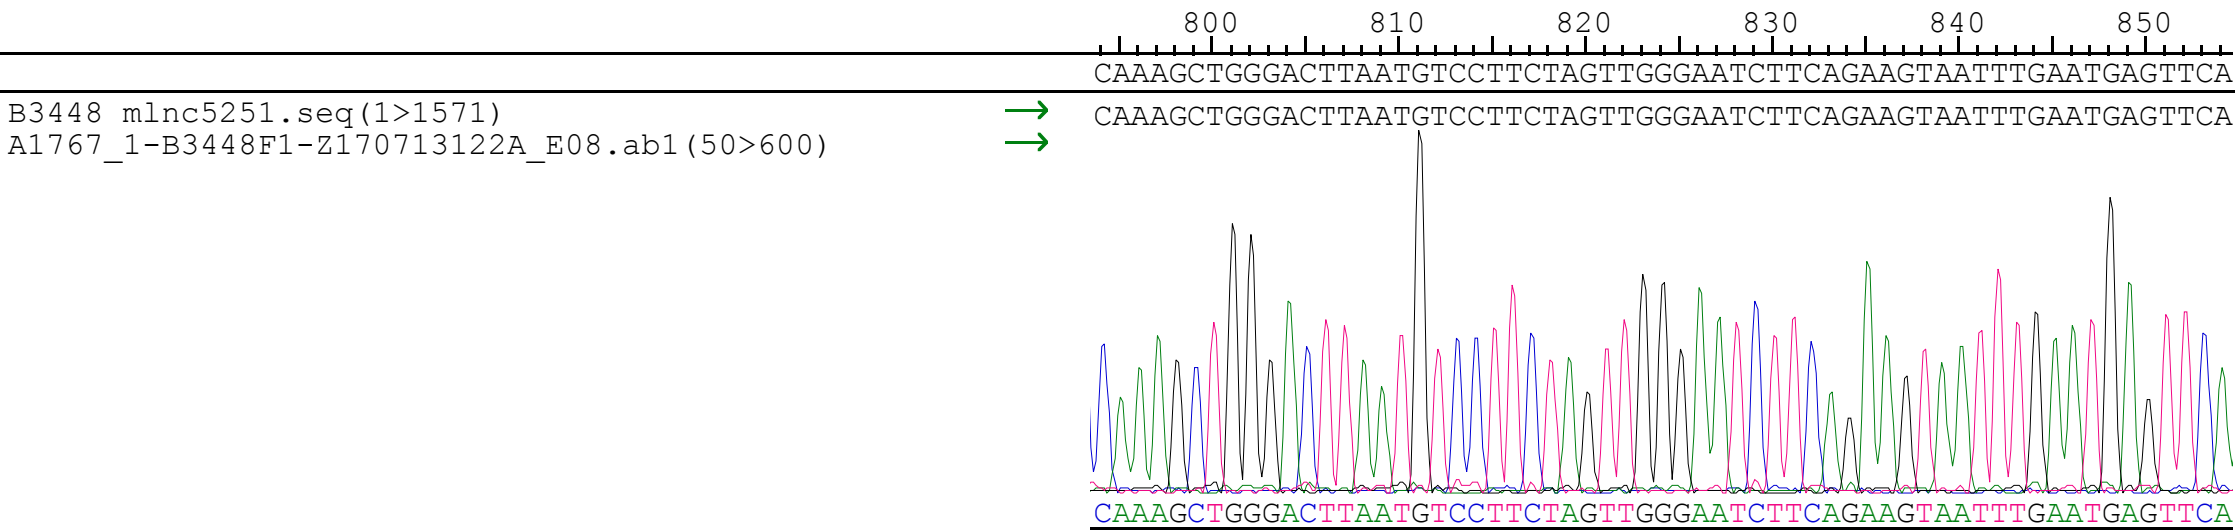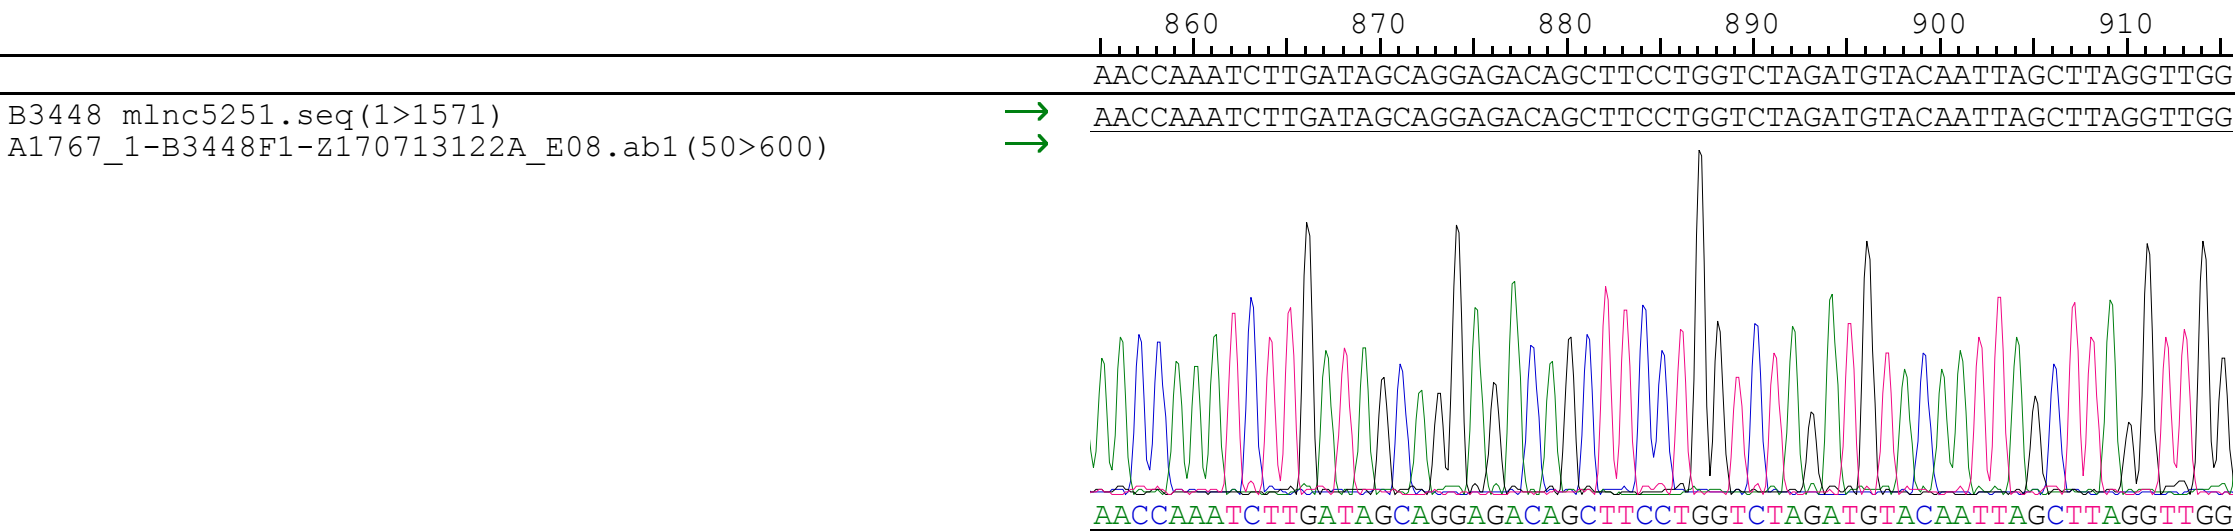



## Project: Alignment of mlnc5251.sqd Contig 1

B3448 mlnc5251.seq (1>1571)  
A1767\_1-B3448F1-Z170713122A\_E08.ab1 (50>600)

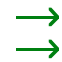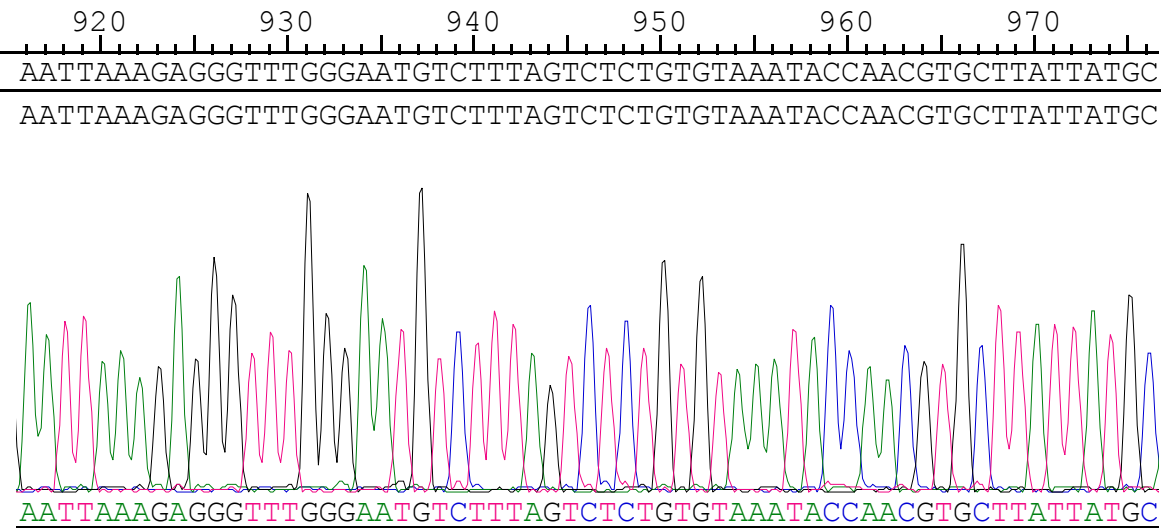

B3448 mlnc5251.seq (1>1571)  
A1767\_1-B3448F1-Z170713122A\_E08.ab1 (50>600)

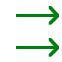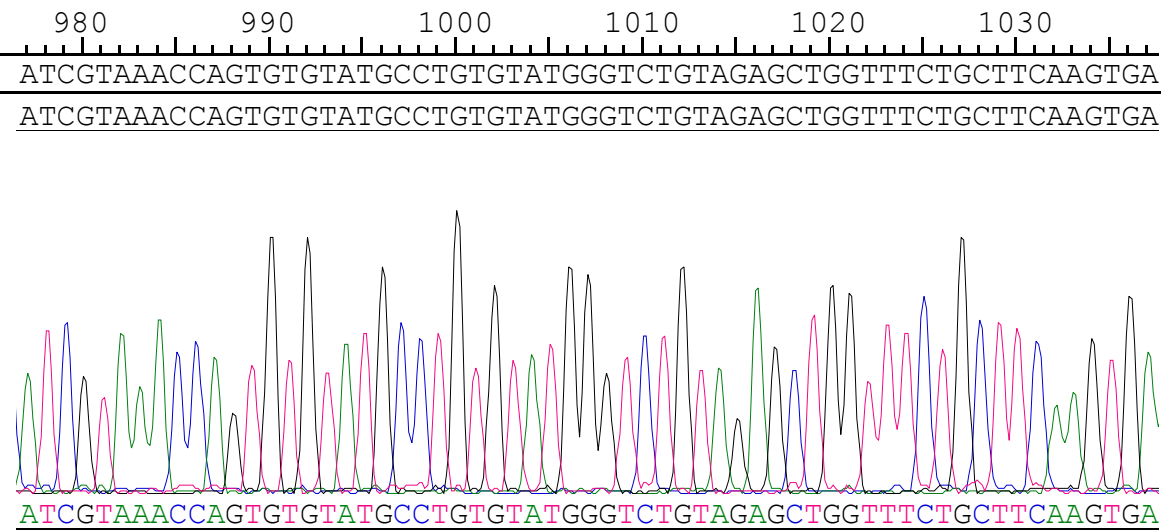

## Project: Alignment of mlnc5251.sqd Contig 1

B3448 mlnc5251.seq (1>1571)  
A1767\_1-B3448F1-Z170713122A\_E08.ab1 (50>600)



1040 1050 1060 1070 1080 1090  
AGCTGCACCTTTGATTTTATAAGGTCCCCTCCACCCGGAACCCTATAAACGTTTGTAAATA

AGCTGCACCTTTGATTTTATAAGGTCCCCTCCACCCGGAACCCTATAAACGTTTGTAAATA

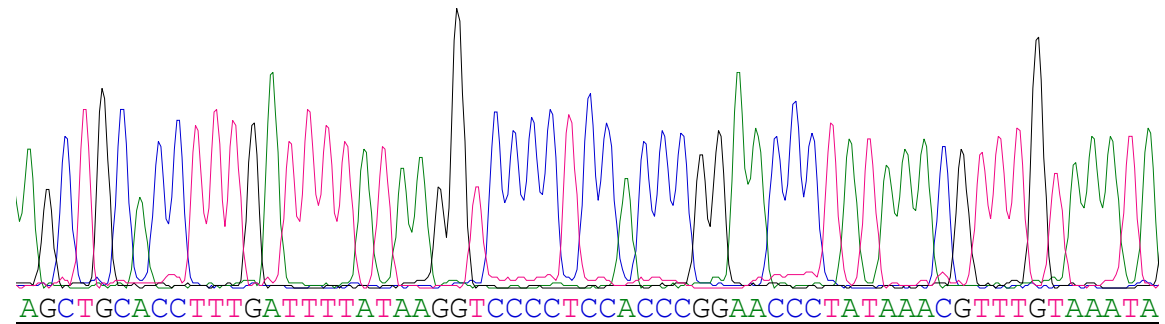

A1767\_1-PIRES2\_EGFP.P3-Z170713122A\_D08.ab1 (50>600)

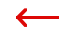

AGCTGCACCTTTGATTTTATAAGGTCCCCTCCACCCGGAACCCTATAAACGTTTGTAAATA

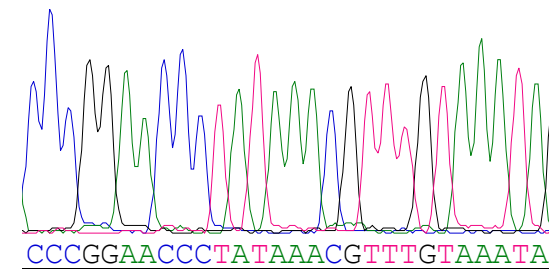

## Project: Alignment of mlnc5251.sqd Contig 1

1100 1110 1120 1130 1140 1150  
GAACACTAAAATTTGTAGCGATAGGATCAATTTGGGAAATATCTGCTGAGAGACCAAAAAG  
B3448 mlnc5251.seq (1>1571) → GAACACTAAAATTTGTAGCGATAGGATCAATTTGGGAAATATCTGCTGAGAGACCAAAAAG  
A1767\_1-B3448F1-Z170713122A\_E08.ab1 (50>600) →

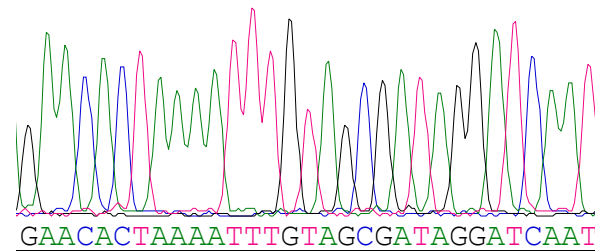

A1767\_1-PIRES2\_EGFP.P3-Z170713122A\_D08.ab1 (50>600) ←

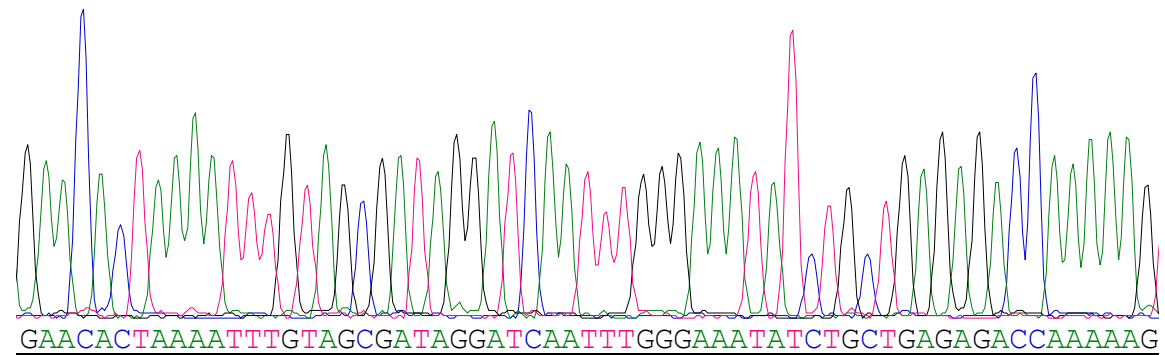

## Project: Alignment of mlnc5251.sqk Contig 1

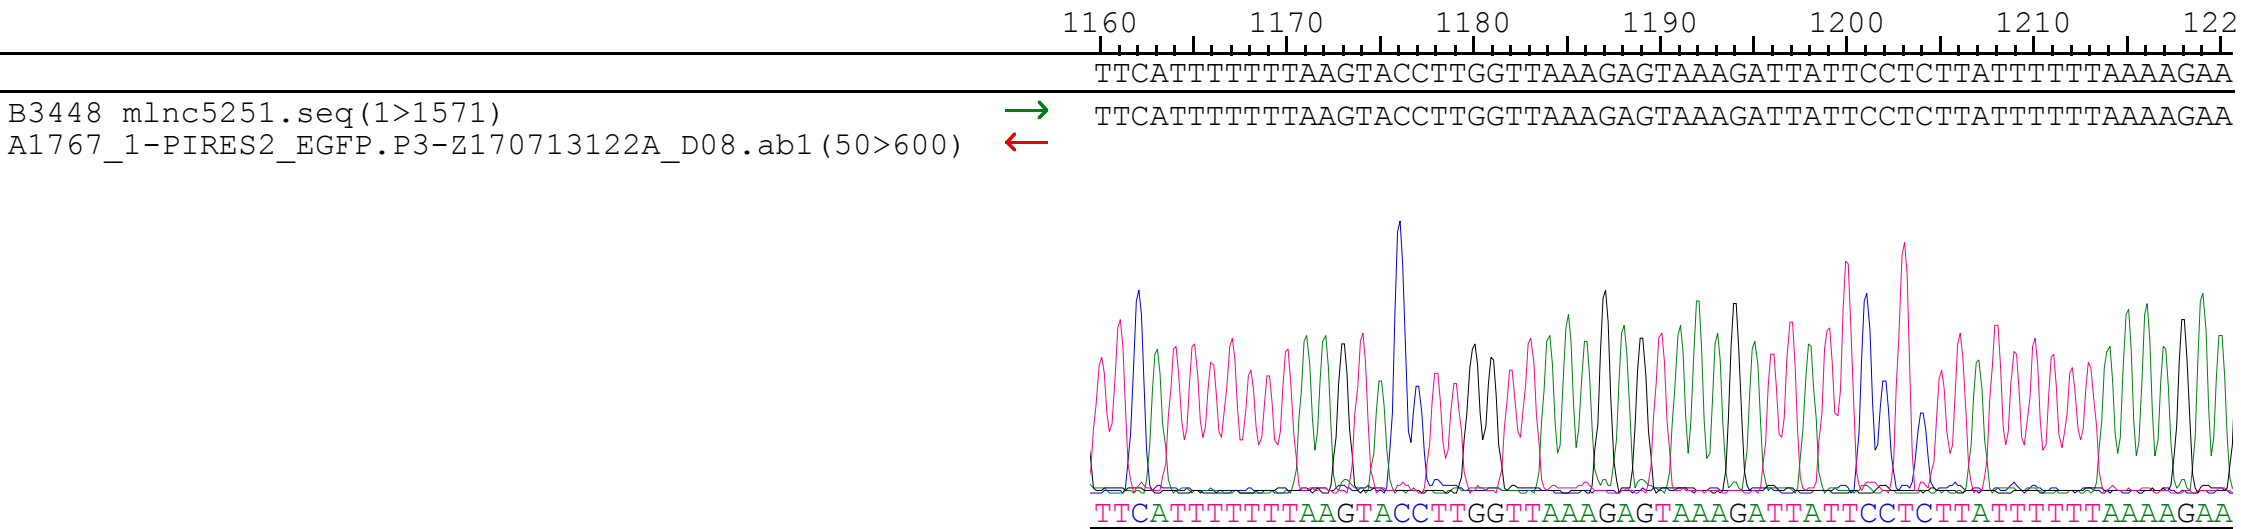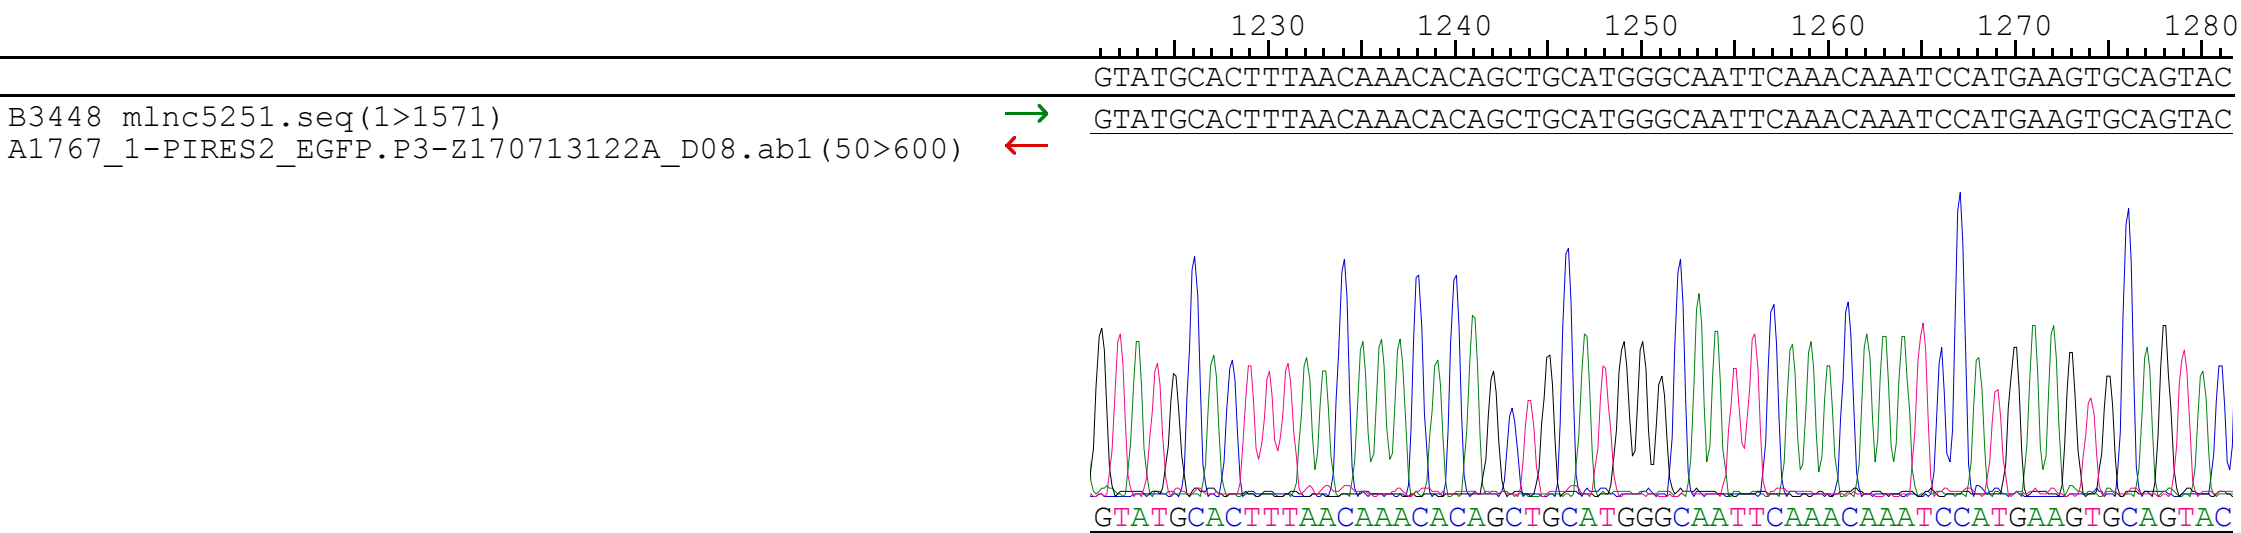

## Project: Alignment of mlnc5251.sq Contig 1

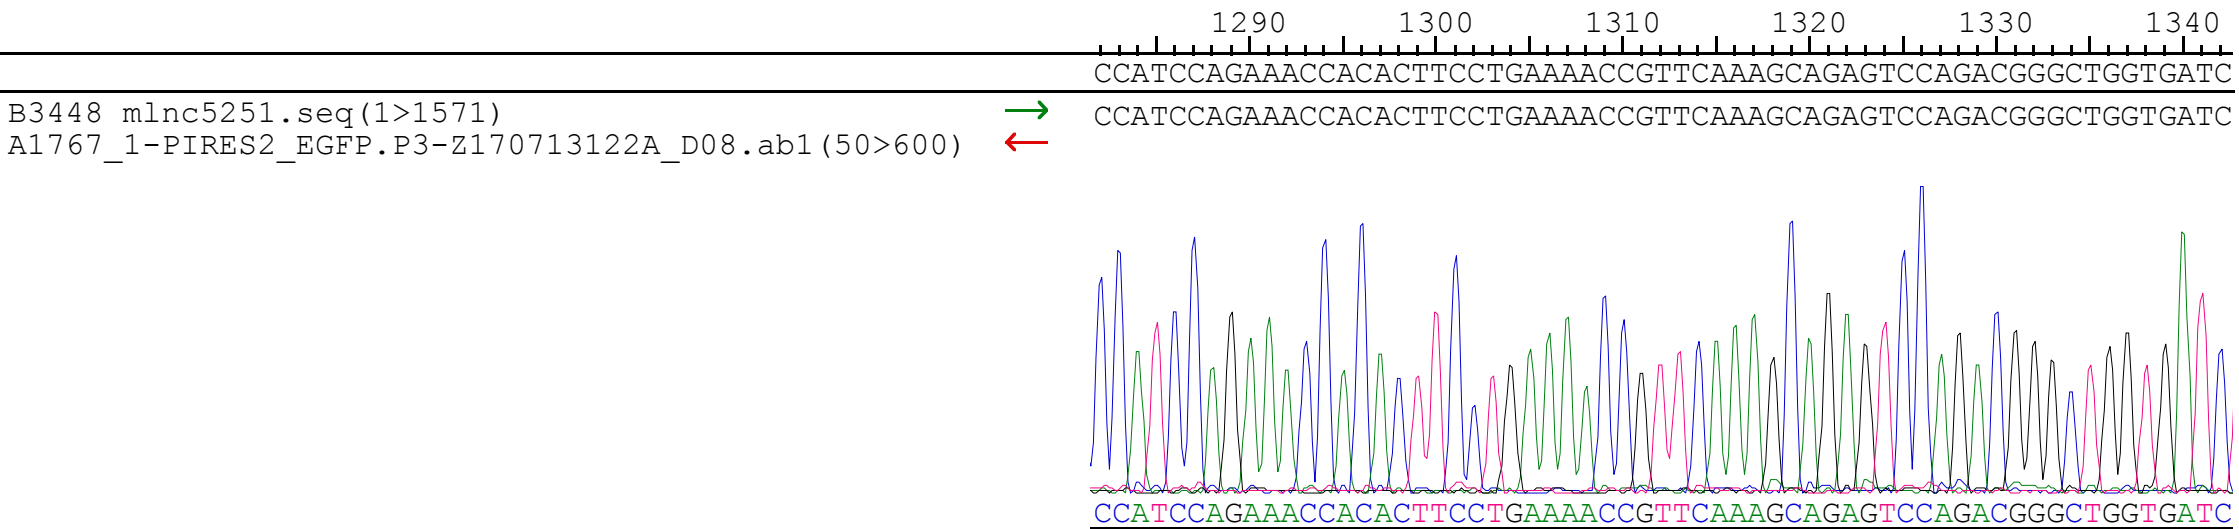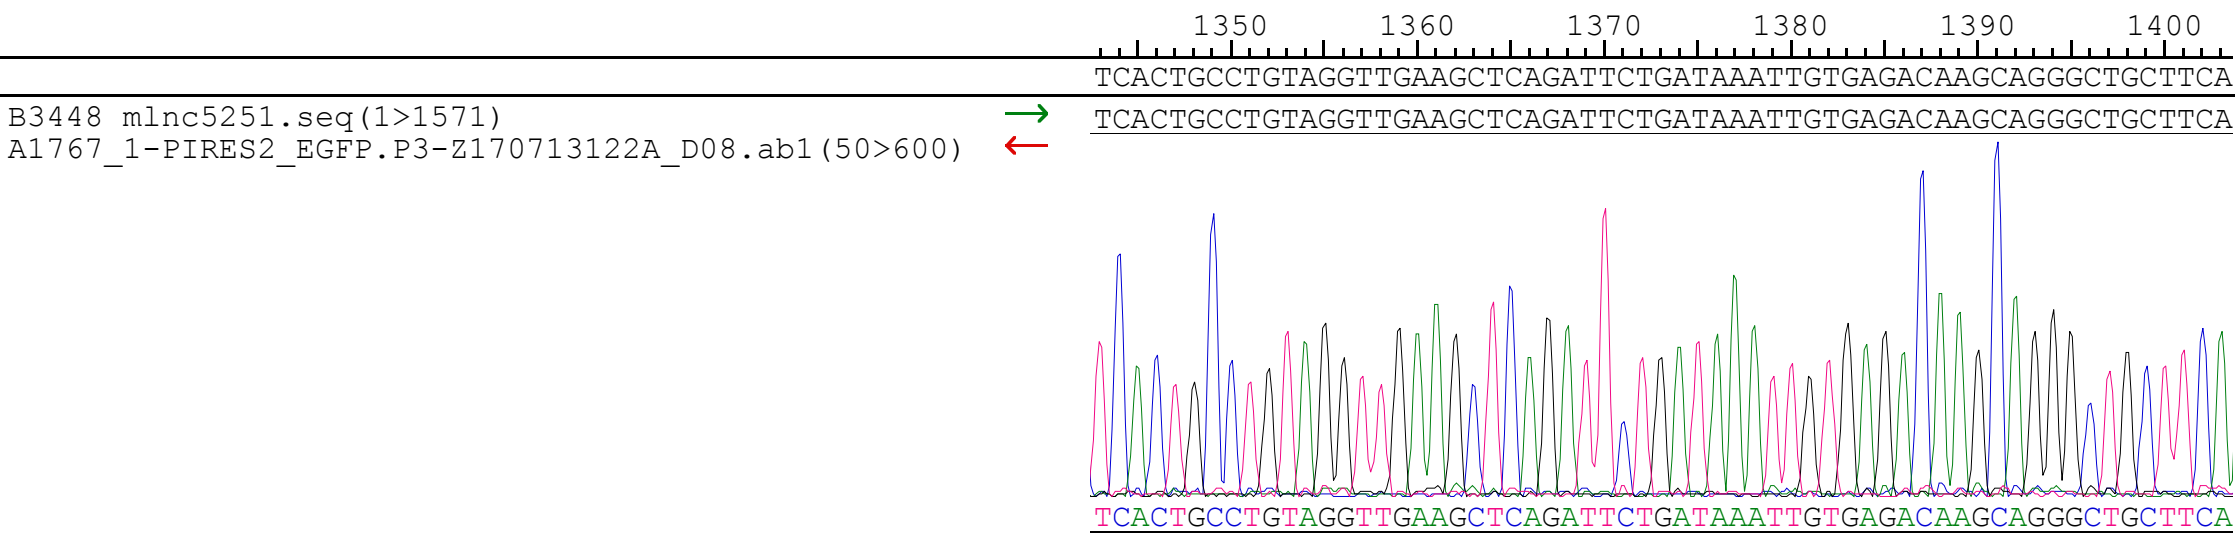

## Project: Alignment of mlnc5251.sq Contig 1

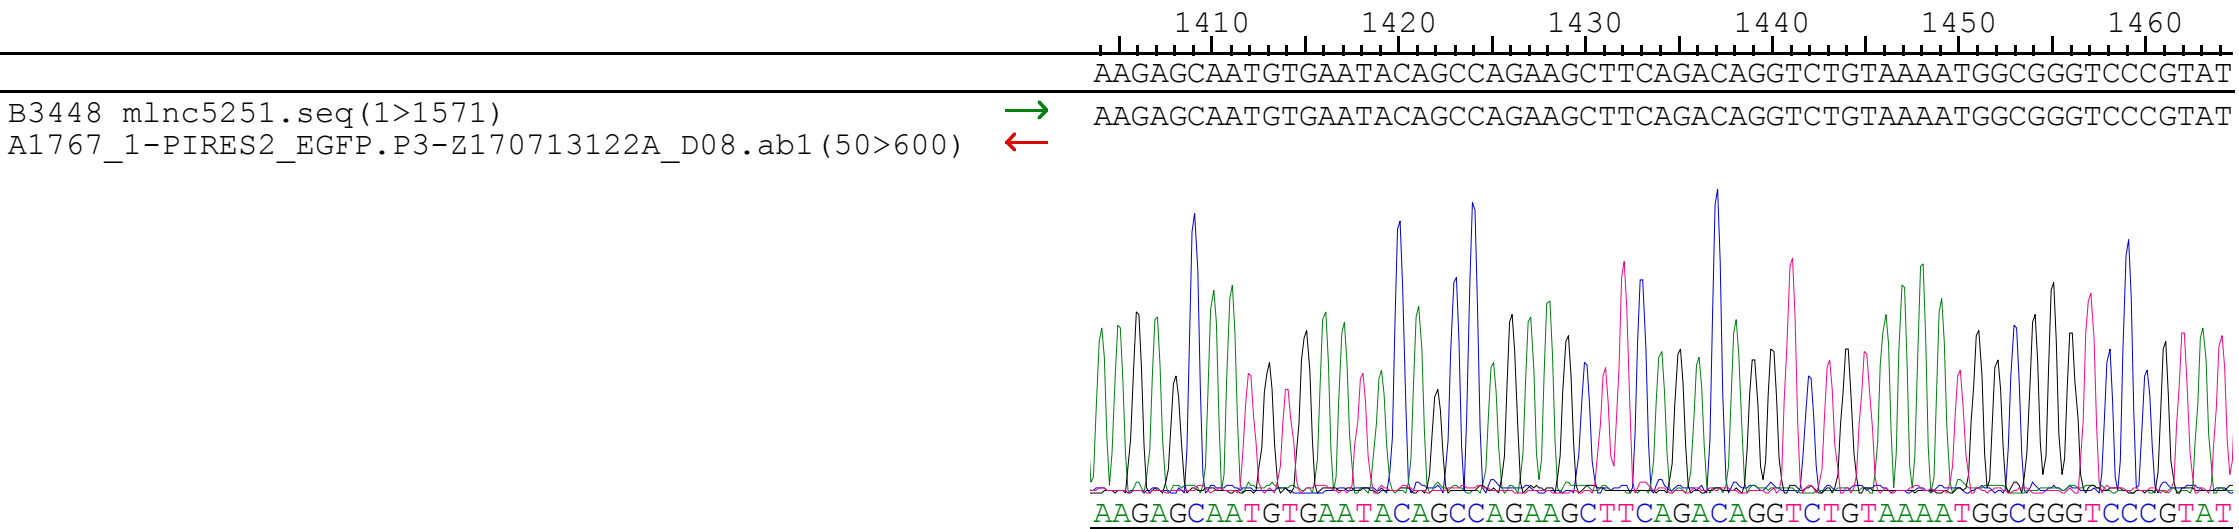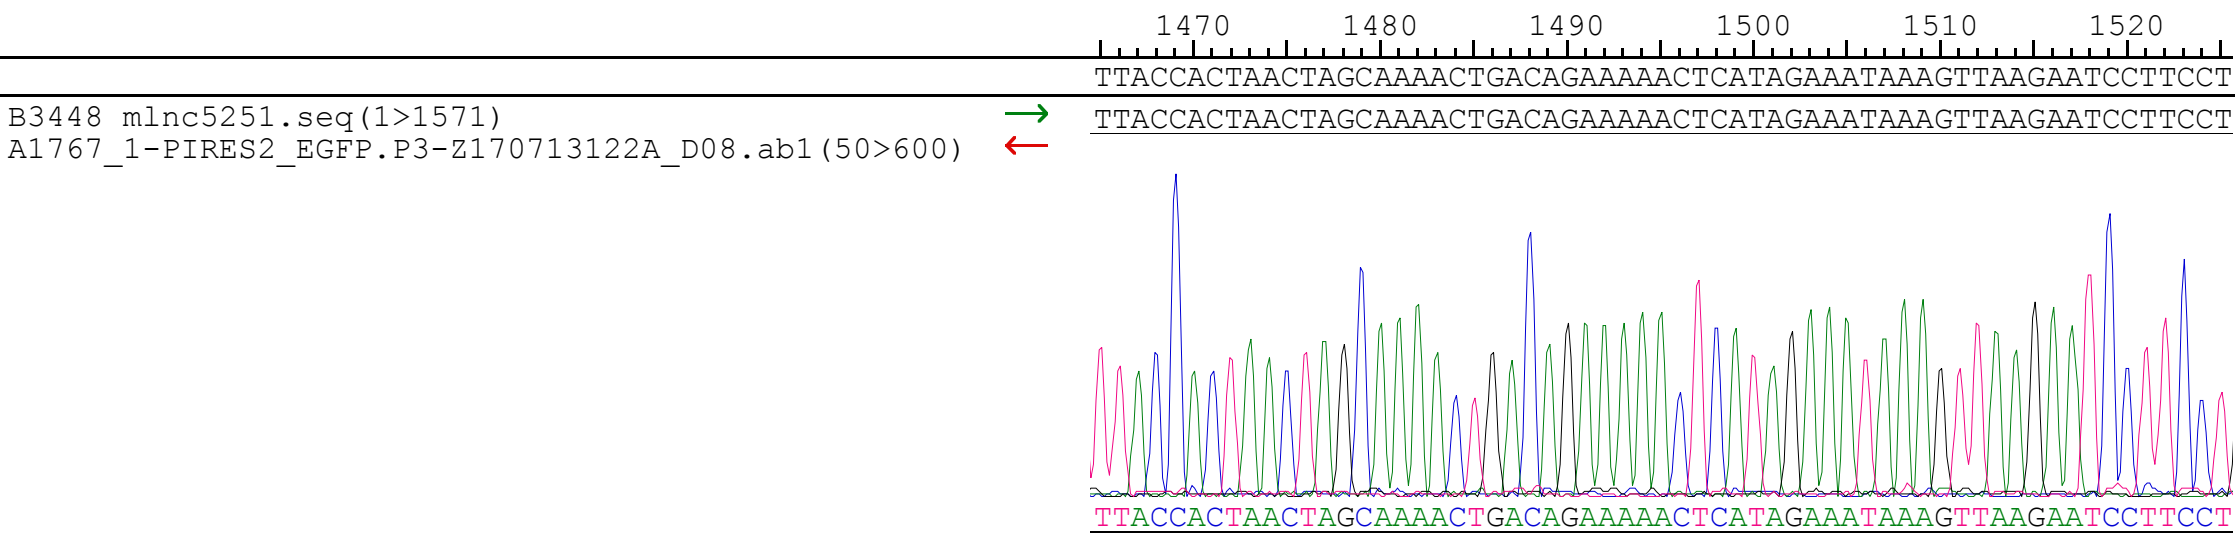



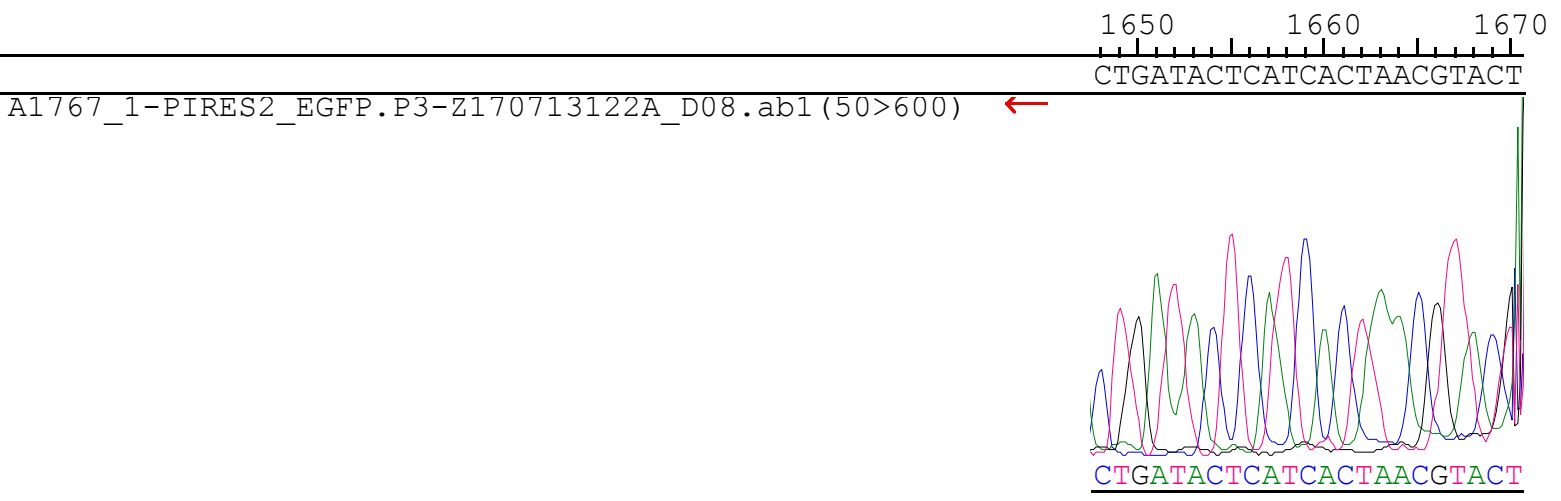

Supplement: 13062_2023_381_MOESM5_ESM.pdf [file 13062_2023_381_MOESM5_ESM.pdf]
